# Supplementary material
Source: PubMed Central journal article supplement (PMC3676029)
Supplement: IAI.00192-13_zii999090152so1.pdf [file IAI.00192-13_zii999090152so1.pdf]

## Supplemental Material

This appendix has been provided by the authors to provide readers additional information about their work.

Supplement to: “Acquisition of the Sda1-encoding bacteriophage does not enhance virulence of the M1 *Streptococcus pyogenes* strain SF370.” Carola Venturini, Cheryl-lynn Y. Ong, Christine M. Gillen, Nouri Ben-Zakour, Peter G. Maamary, Victor Nizet, Scott A. Beatson and Mark J. Walker

Supplementary Tables

2

## Supplementary tables

**Supplementary Table 1. PCR primers and cycling conditions used in this study.**

| Primer name | 5'-3' sequence                         | PCR*                                     | Target reference (GenBank; SPy number)                        |
|-------------|----------------------------------------|------------------------------------------|---------------------------------------------------------------|
| ZSF         | gggtcgacctaaaggttggatgcctacaacagcacttg | <i>speB</i>                              | <i>speB</i> (NC_007297.1;SPy_1735)                            |
| ZSR         | tccacctaatgctaaaagacttaataatctggatcccc | <i>speB</i>                              | <i>speB</i> (NC_007297.1;SPy_1735)                            |
| speCF2      | acatcatcaaaatagtttcata                 | <i>speC</i>                              | <i>speC</i> (NC_002737.1;SPy_0711)                            |
| speCR2      | atgactaaagttctcatattgata               | <i>speC</i>                              | <i>speC</i> (NC_002737.1;SPy_0711)                            |
| speAFcv     | ctcaacaagaccccgatccaa                  | <i>speA2</i>                             | <i>speA2</i> (NC_007297.1;SPy_0996)                           |
| speARcv     | cccctccgtagatacatgcactcc               | <i>speA2</i>                             | <i>speA2</i> (NC_007297.1;SPy_0996)                           |
| sdaF1       | ataacaaaaggaggacataaat                 | φ5448.3 cargo gene                       | <i>sdaD2</i> (NC_007297.1;SPy_1415)                           |
| sdaR1       | aaattcaacagaccaactaga                  | φ5448.3 cargo gene                       | <i>sdaD2</i> (NC_007297.1;SPy_1415)                           |
| Sda-att5F   | tctctaagataattggctctg                  | φ5448.3 attachment 5'                    | <i>nusA</i> (NC_007297.1;SPy_1412)                            |
| sdaR4       | atctacgtcagcagtagaaga                  | φ5448.3 attachment 5'                    | <i>sdaD2</i> (NC_007297.1;SPy_1415)                           |
| Sda-att3F   | tcagtatccaagctgttggg                   | φ5448.3 attachment 3'                    | φ5005.3 integrase <i>int.3</i><br>(NC_007297.1;SPy_1467)      |
| Sda-att3R   | ccctgagacgatctggcttga                  | φ5448.3 attachment 3'                    | t-RNA methyltransferase <i>trmB</i><br>(NC_007297.1;SPy_1468) |
| Φ-sdaF      | cgctgatgttagcatagatt                   | φ5448.3 – <i>sda</i> gene<br>boundary 5' | non-coding 5' of <i>sdaD2</i> (NC_007297.1)                   |
| Φ-sdaR      | gtatgcgaaattacatgctca                  | φ5448.3 – <i>sda</i> gene<br>boundary 3' | non-coding 3' of <i>sdaD2</i> (NC_007297.1)                   |

\*PCR amplification conditions for all reactions were as follows: 94°C 40s - Ta°C 40s - 72°C 2 min; 35 cycles. Ta, annealing temperature.

Final denaturation was 72°C for 4 min. Ta was 55°C for all reactions except *speA* amplification where Ta was 63°C.
